# Supplementary material
Source: PubMed Central journal article supplement (PMC5059808)
Supplement: supp_tpc.16.00439_TPC2016-00439-RAR1_Supplemental_Figures.pdf [file supp_tpc.16.00439_TPC2016-00439-RAR1_Supplemental_Figures.pdf]

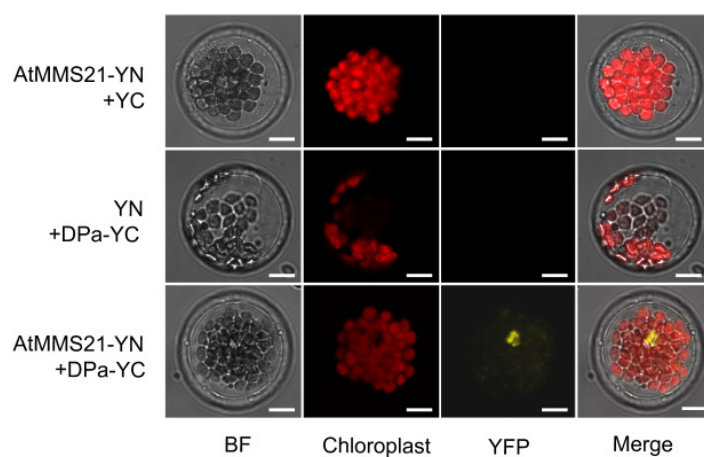

**Supplemental Figure 1. Detection of DPa-AtMMS21 interaction by bimolecular fluorescence complementation.** The protoplasts were co-transformed with plasmid pairs: *AtMMS21-YN* (*AtMMS21* fused with N terminal of EYFP) and *YC* (empty vector with C terminal of EYFP); *YN* (empty vector with N terminal of EYFP) and *DPa-YC* (*DPa* fused with C terminal of EYFP); *AtMMS21-YN* and *DPa-YC*. Representative YFP signals were detected by confocal microscopy 48 hours after transformation. The autofluorescence from chloroplasts and bright field (BF) signals were also detected and merged. Bar=10  $\mu$ m.

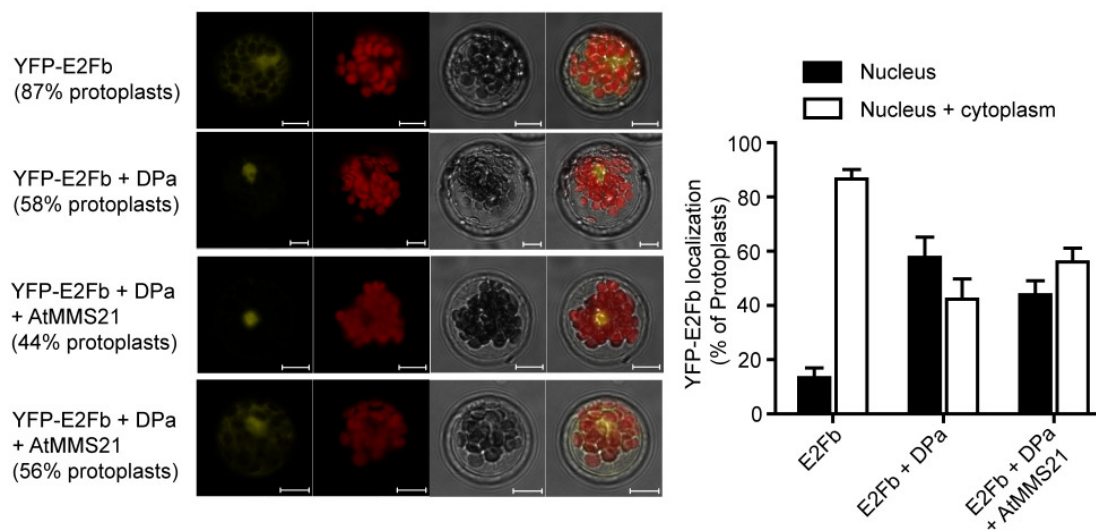

**Supplemental Figure 2. Subcellular distribution of YFP-fused E2Fb in protoplasts.**

YFP-E2Fb was transiently expressed in protoplasts from wild-type and transgenic plants carrying *35S:DPa* alone or both *35S:DPa* and *35S:AtMMS21*. Representative YFP signals from the majority of the indicated protoplasts are shown. Bar=10  $\mu$ m. Statistical data from means  $\pm$  SD for three independent biological replicates ( $n > 100$ ) are shown in the right panel.

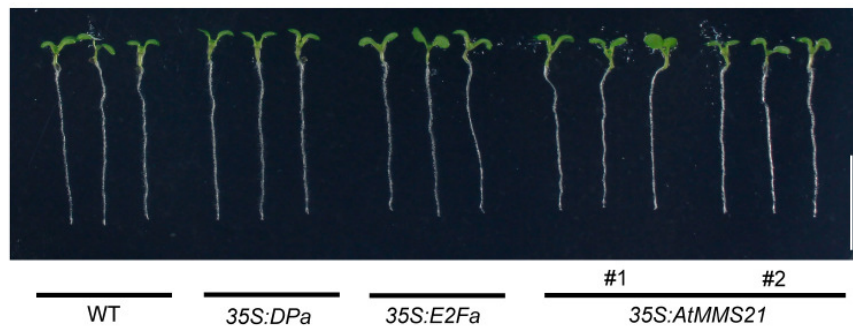

**Supplemental Figure 3. The phenotypes of WT, 35S:DPa, 35S:E2Fa, and 35S:AtMMS21 seedlings.** The photograph was taken 5 days after germination. Bar=1 cm.

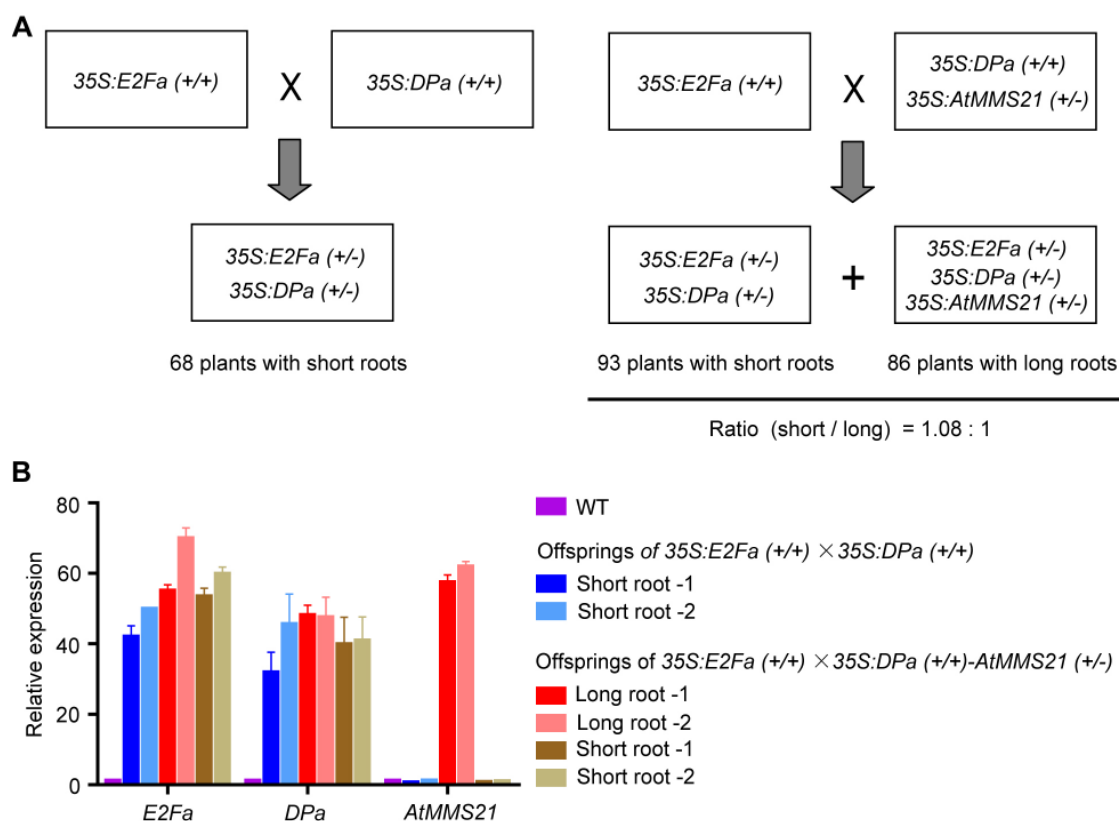

**Supplemental Figure 4. The generation and identification of plants carrying 35S:*E2Fa*-*DPa*-*AtMMS21*.** (A) The crossing scheme for generation of 35S:*E2Fa*-*DPa* and 35S:*E2Fa*-*DPa*-*AtMMS21*. The ratio of offsprings with long and short roots is shown. (B) The expression levels of *E2Fa*, *DPa* and *AtMMS21* in the plants generated from crossing were analyzed by real time PCR. The data are means $\pm$ SD from triplicated experiments.

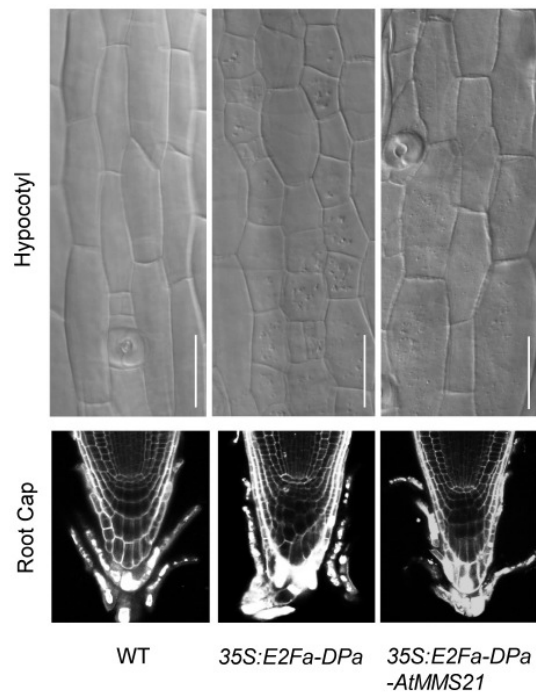

**Supplemental Figure 5. The phenotypes of hypocotyl and root cap of the *35S:E2Fa-DPa-AtMMS21* plants.** Hypocotyls of 12-day-old plants are shown in the top panel. Bar = 50  $\mu$ m. Root caps of 7-day-old plants after PI staining are shown in the bottom panel.
